# Supplementary material for: Preparation of carbon coated hyperdispersed Ru nanoparticles supported on TiO2 HER electrocatalysts by dye-sensitization
Source: Royal Society of Chemistry journal article supplement (doi:10.1039/d3nj01546g), 2023-01-01
Supplement: d3nj01546g1.pdf [file d3nj01546g1.pdf]

*Supporting information*

**Preparation of Carbon Coated Hyperdispersed Ru  
Nanoparticles Supported on TiO<sub>2</sub> HER Electrocatalysts by  
Dye-Sensitization**

Hong-Cheng Li, Peng-Cheng Ji, Yang Teng, Hai-Lang Jia,\* Ming-Yun Guan

School of Chemistry and Chemical Engineering, Institute of Advanced Functional Materials for  
Energy, Analysis and Testing Center of Jiangsu University of Technology, Jiangsu University of  
Technology, Changzhou 213001, P. R. China.

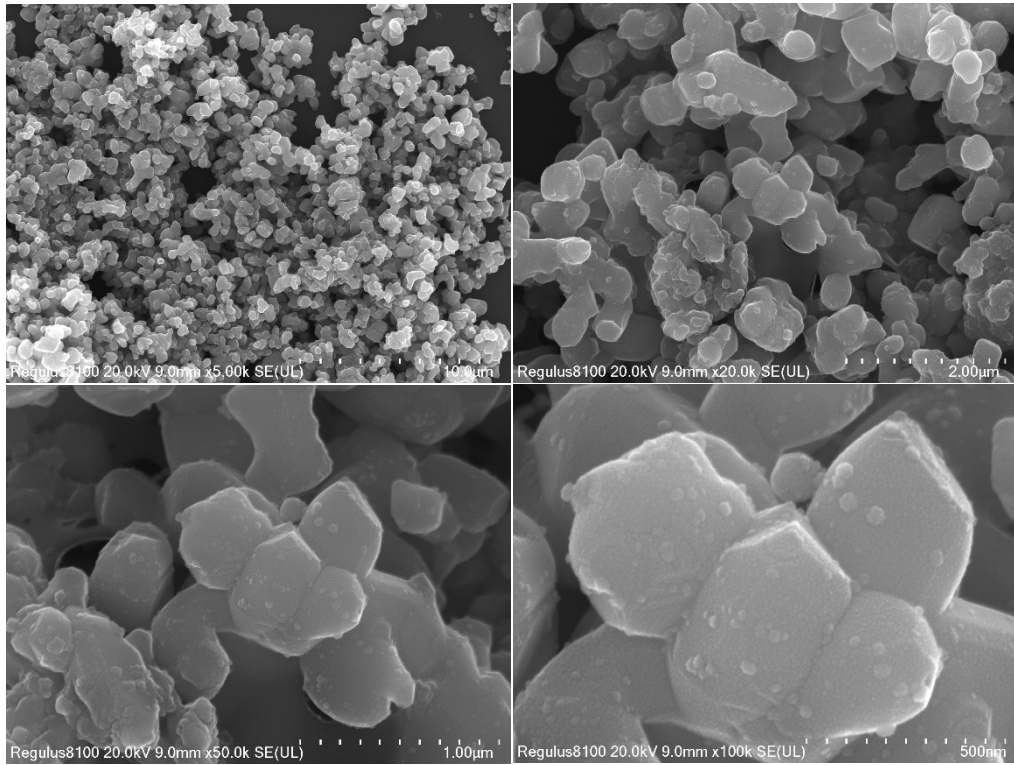

**Fig. S1** SEM of Ru/TiO<sub>2</sub>

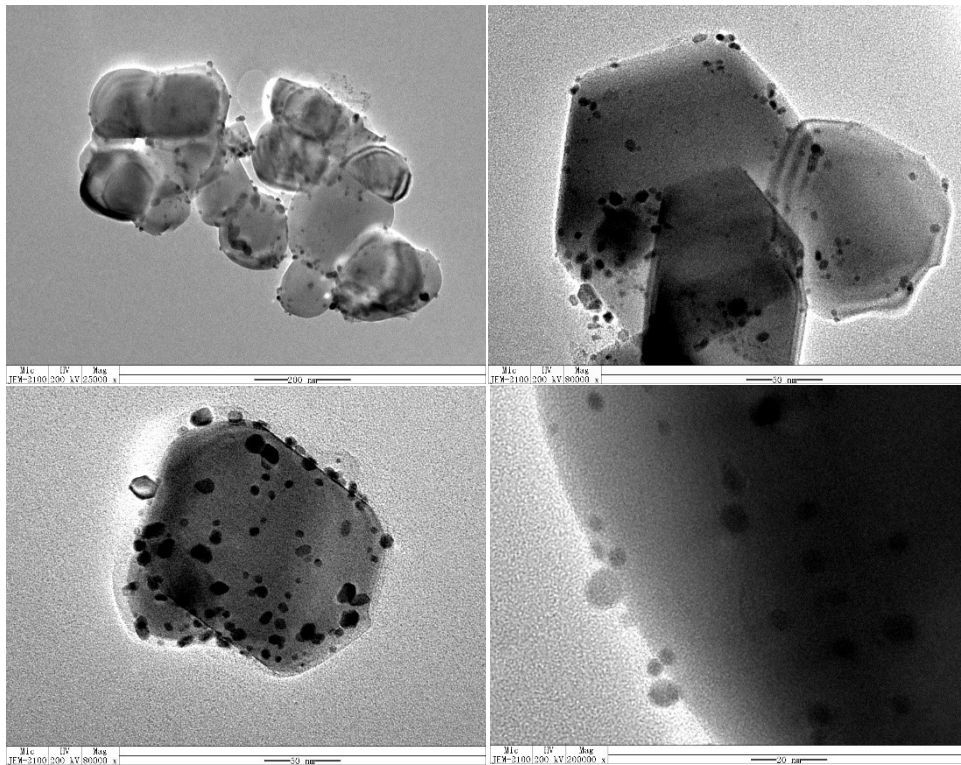

**Fig. S2** TEM of Ru/TiO<sub>2</sub>

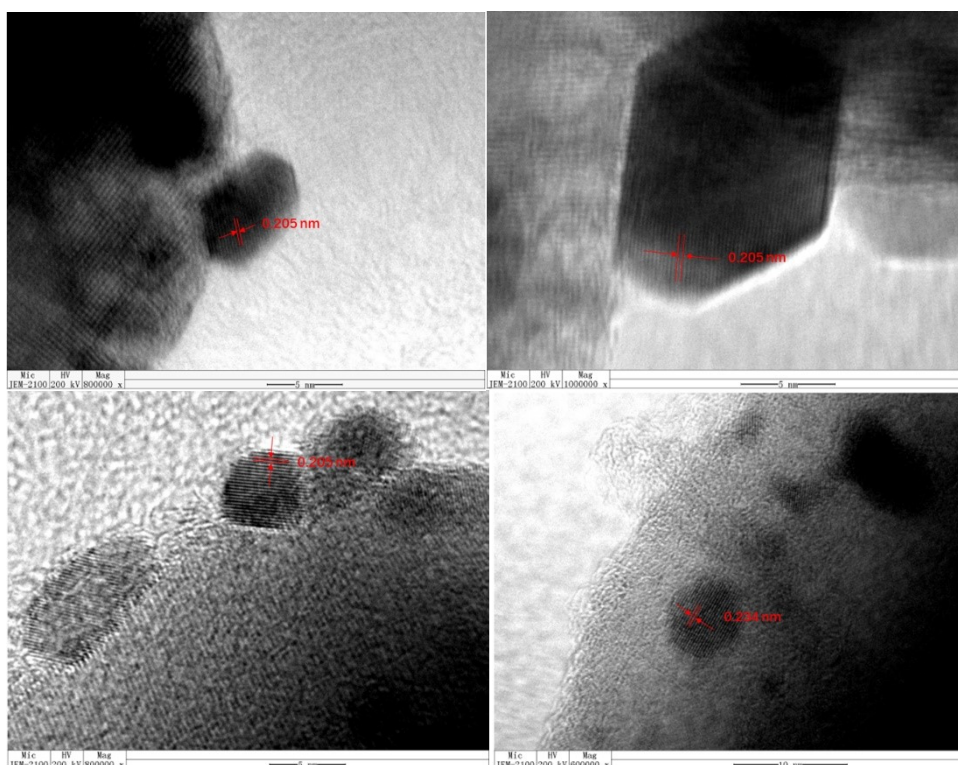

**Fig. S3** HR-TEM of Ru/TiO<sub>2</sub>

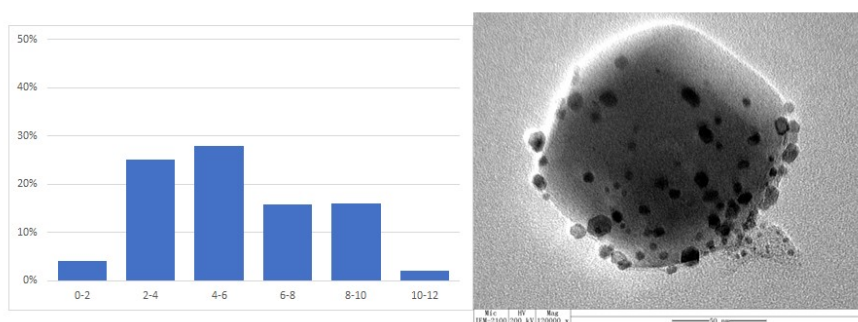

**Fig. S4** Particle size distribution of Ru/TiO<sub>2</sub>

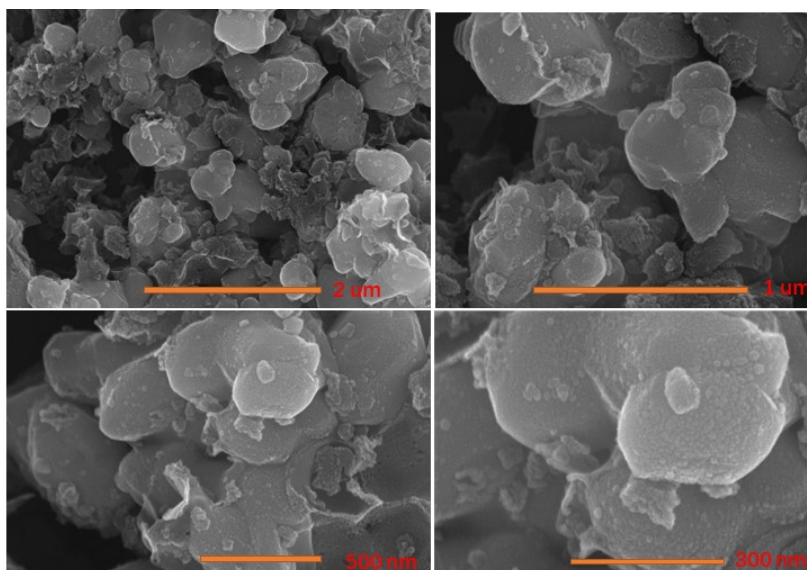

**Fig. S5** SEM of C/Ru/TiO<sub>2</sub>

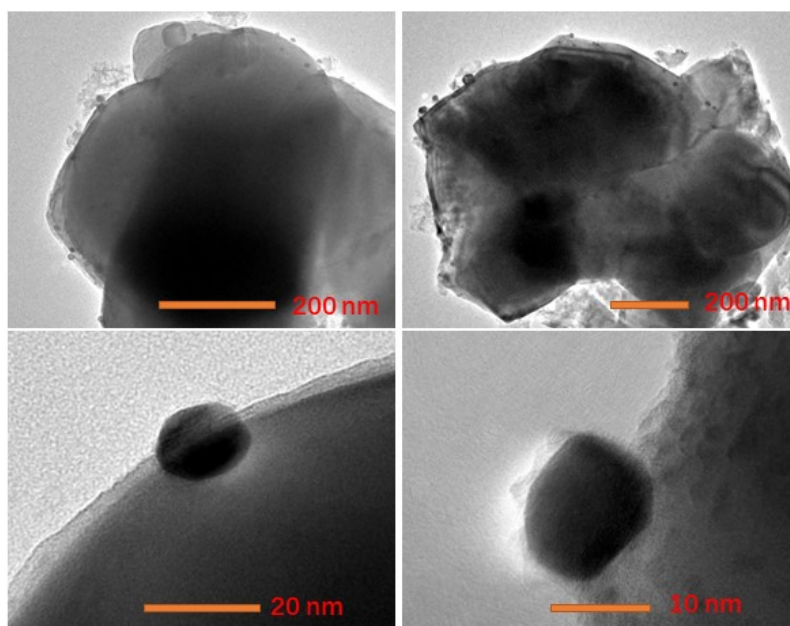

**Fig. S6** TEM of C/Ru/TiO<sub>2</sub>

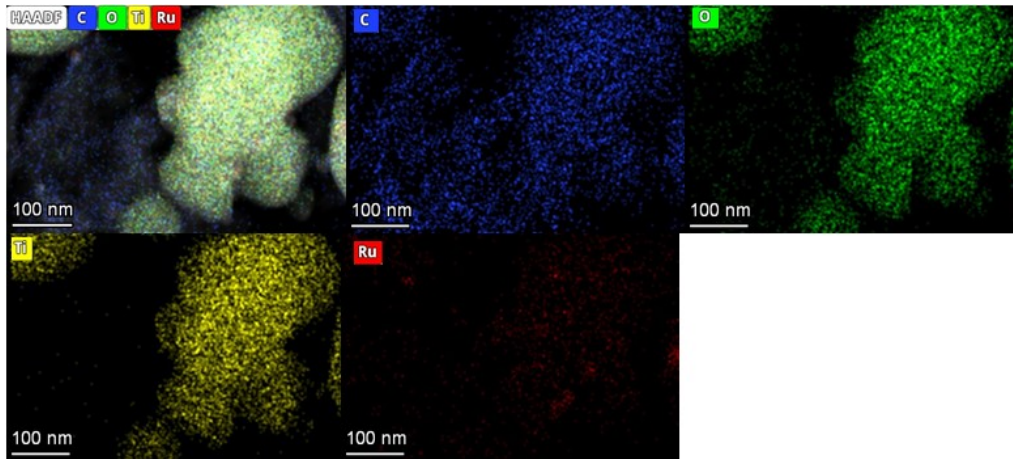

**Fig. S7** TEM-EDS Mapping of C/Ru/TiO<sub>2</sub>

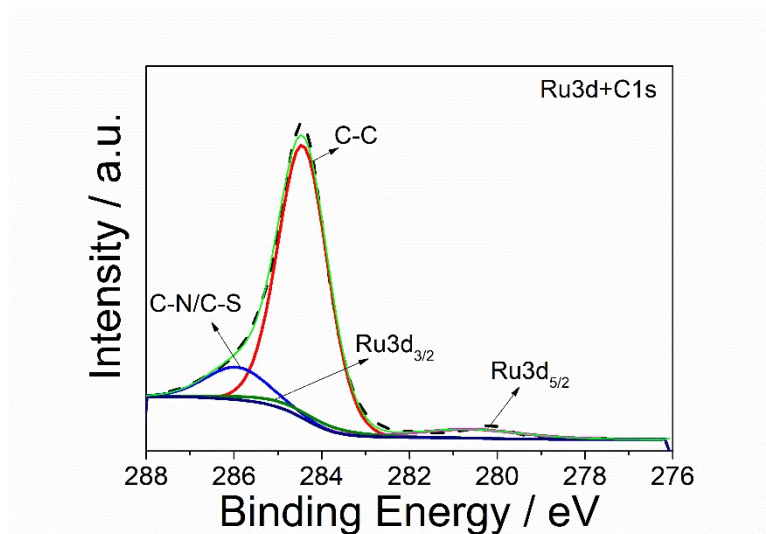

**Fig. S8** High-resolution XPS spectra for Ru<sub>3d</sub>+C<sub>1s</sub>

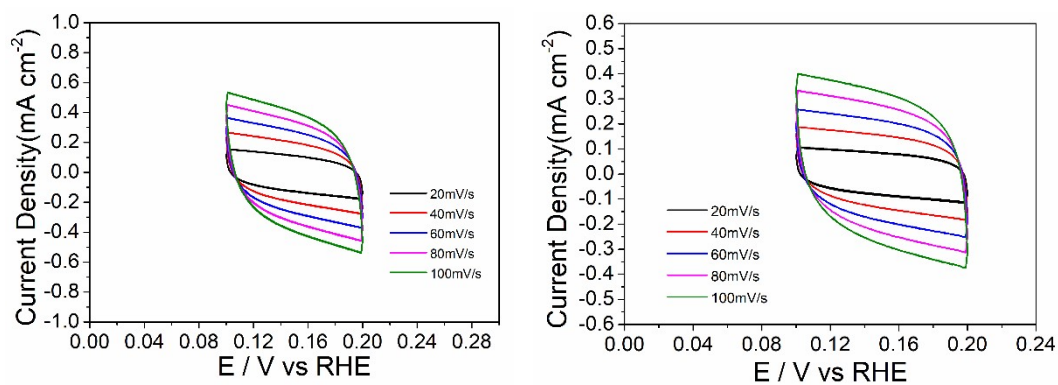

**Fig. S9** CV curves of Ru/TiO<sub>2</sub>, (left) in 1 M KOH, (right) in 0.5 M H<sub>2</sub>SO<sub>4</sub>

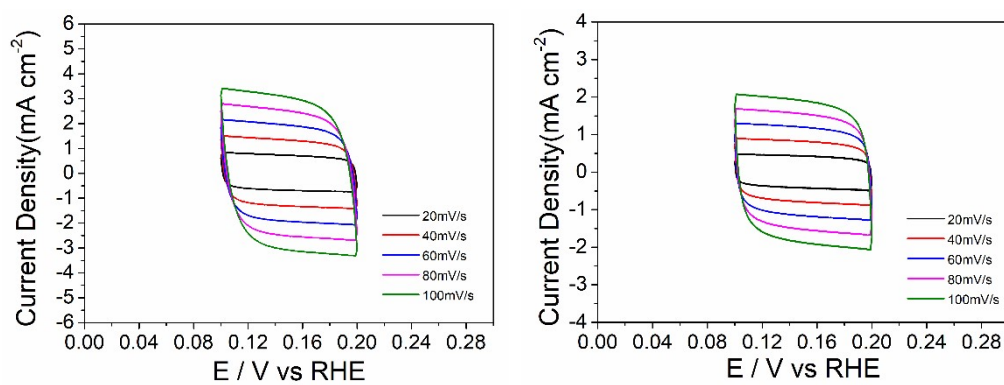

**Fig. S10** CV curves of C/Ru/TiO<sub>2</sub>, (left) in 1 M KOH, (right) in 0.5 M H<sub>2</sub>SO<sub>4</sub>

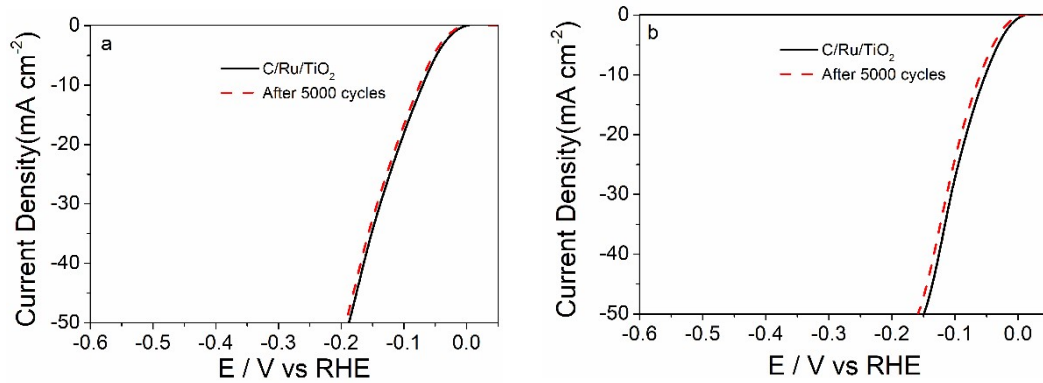

**Fig. S11** LSVs of C/Ru/TiO<sub>2</sub> catalysts before and after 5000 CV cycles in 0.5 M H<sub>2</sub>SO<sub>4</sub> (left) and 1M KOH (right).

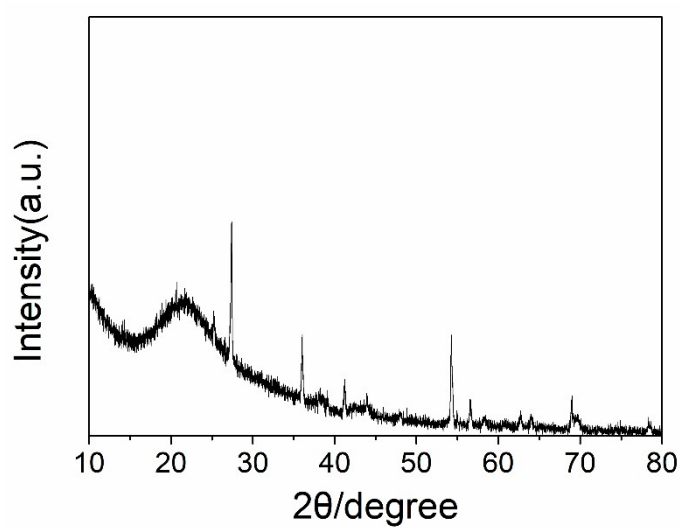

**Fig. S12** XRD of C/Ru/TiO<sub>2</sub> after 5000 CV cycles

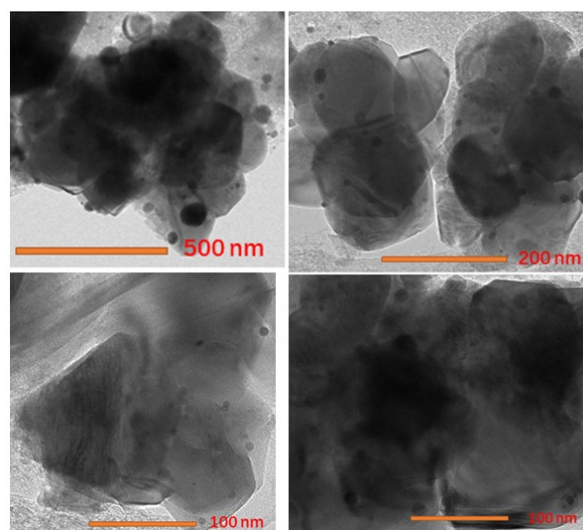

**Fig. S13** TEM of C/Ru/TiO<sub>2</sub> after 5000 CV cycles

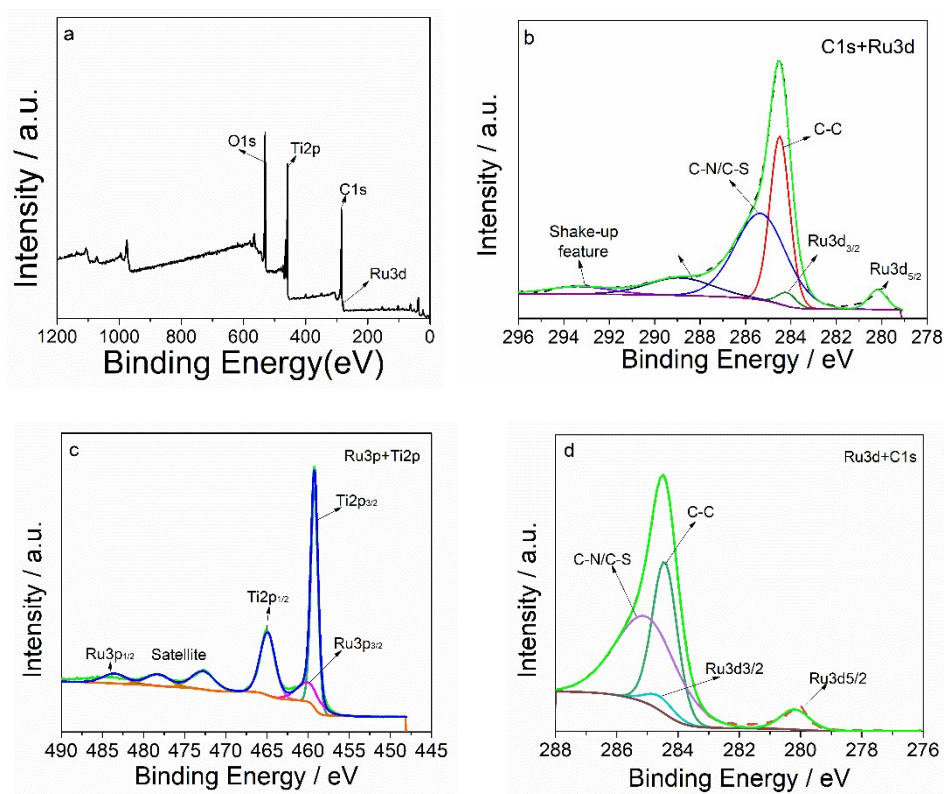

**Fig. S14** (a) XPS survey spectra of C/Ru/TiO<sub>2</sub> after 5000 CV cycles, (c-d) high-resolution XPS spectra of C<sub>1s</sub>, Ti<sub>2p</sub>, Ru<sub>3d</sub>



**Table S1.** Summary of HER catalytic activities of C/Ru/TiO<sub>2</sub> and some other catalysts reported in recent literatures (the potential is obtained at a current density of 10 mA cm<sup>-2</sup> for HER in 0.5 M H<sub>2</sub>SO<sub>4</sub>).

| Catalysts                                     | HER<br>Overpotential<br>@10 mA cm <sup>-2</sup><br>(mV) | Tafel<br>Slope (mV<br>dec <sup>-1</sup> ) | Ref.                |
|-----------------------------------------------|---------------------------------------------------------|-------------------------------------------|---------------------|
| <b>C/Ru/TiO<sub>2</sub></b>                   | <b>69</b>                                               | <b>70</b>                                 | <b>In this work</b> |
| Pt <sub>0.095</sub> -Ru <sub>2</sub> P@Ru/CNT | 27                                                      | 20                                        | 1                   |
| h-RuNS                                        | 154                                                     | 102                                       | 2                   |
| Ru/CoxP@NC                                    | 165                                                     | 55                                        | 3                   |
| Ru/Ni <sub>2</sub> P@NPC                      | 89                                                      | 62                                        | 4                   |
| RuP <sub>2</sub> /CNT                         | 58                                                      | 57                                        | 5                   |
| Ru@Co/N-CNTs                                  | 92                                                      | 53                                        | 6                   |
| Rh-Rh <sub>2</sub> P@C                        | 24                                                      | 36                                        | 7                   |
| Ru/CN                                         | 127                                                     | /                                         | 8                   |
| Ru-MoS <sub>2</sub>                           | 300                                                     | /                                         | 9                   |
| C <sub>3</sub> N <sub>4</sub> -Ru-F           | 29                                                      | /                                         | 10                  |
| Pt <sub>1</sub> Ru <sub>1</sub> /NMHCS-A      | 22                                                      | 38                                        | 11                  |
| Ru <sub>1</sub> CoP/CDs                       | 49                                                      | 52                                        | 12                  |

|                                            |      |      |    |
|--------------------------------------------|------|------|----|
| RuSA-N-S-Ti <sub>3</sub> C <sub>2</sub> Tx | 76   | 90   | 13 |
| A-Pt                                       | 18.8 | 27.8 | 14 |
| Ru-N/BC                                    | 79   | 62   | 15 |

**Table S2.** Summary of HER catalytic activities of C/Ru/TiO<sub>2</sub> and some other catalysts reported in recent literatures (the potential is obtained at a current density of 10 mA cm<sup>-2</sup> for HER in 1 M KOH).

| Catalysts                                      | HER<br>Overpotential @10<br>mA cm <sup>-2</sup> (mV) | Tafel Slope<br>(mV dec-1) | Ref.                |
|------------------------------------------------|------------------------------------------------------|---------------------------|---------------------|
| <b>C/Ru/TiO<sub>2</sub></b>                    | <b>51</b>                                            | <b>68</b>                 | <b>In this work</b> |
| Ni <sub>1</sub> Ru <sub>1</sub> /C             | 13                                                   | 33                        | 16                  |
| Pt <sub>0.095</sub> -Ru <sub>2</sub> P@Ru/CNT  | 14                                                   | 31                        | 17                  |
| NiRu@MWCNTs                                    | 14                                                   | 32                        | 18                  |
| RuNi <sub>1</sub> Co <sub>1</sub> @CMT         | 78                                                   | 77                        | 19                  |
| Ru-Ni <sub>0.85</sub> Co <sub>0.15</sub> Se/NF | 18                                                   | 35                        | 20                  |
| Ru MNSs                                        | 24                                                   | 34                        | 21                  |
| Ru <sub>1</sub> CoP/CDs                        | 51                                                   | 73                        | 22                  |
| Ru <sub>0.10</sub> @2H-MoS <sub>2</sub>        | 51                                                   | 65                        | 23                  |
| Ru/Co <sub>3</sub> O <sub>4</sub> NWs          | 31                                                   | 70                        | 24                  |
| FeRu NPs/C                                     | 33                                                   | 43                        | 25                  |
| Ru@NiCo-MOF HPNs                               | 284                                                  | /                         | 26                  |

|                          |     |    |    |
|--------------------------|-----|----|----|
| RuCo@NC                  | 280 | /  | 27 |
| RuCo@C-350               | 91  | 83 | 28 |
| Ru@C <sub>2</sub> N      | 17  | 38 | 29 |
| Ru-MoS <sub>2</sub> /CNT | 50  | 62 | 30 |

## References

[1] H. Miao, D. Zhang, Y. Shi, X. Wu, W. Zhang, X. Chen, J. Lai, L. Wang, Ultrasmall Noble Metal Doped Ru<sub>2</sub>P@Ru/CNT as High-Performance Hydrogen Evolution Catalysts, *ACS Sustainable Chem. Eng.*, 2021, **9**, 15063–15071.

[2] C. Zhang, F. Han, Hollow Ru Nanoparticles for Electrocatalytic Hydrogen Evolution, *ACS Appl. Nano Mater.*, 2021, **4**, 8530-8538.

[3] C.-D. Si, Z.-X. Wu, J. Wang, Z.-H. Lu, X.-F. Xu, J.-S. Li, Enhanced the Hydrogen Evolution Performance by Ruthenium Nanoparticles Doped into Cobalt Phosphide Nanocages, *ACS Sustainable Chem. Eng.*, 2019, **7**, 9737-9742.

[4] J.-Q. Chi, X.-Y. Zhang, X. Ma, B. Dong, J.-Q. Zhang, B.-Y. Guo, M. Yang, L. Wang, Y.-M. Chai, C. Liu, Interface Charge Engineering of Ultrafine Ru/Ni<sub>2</sub>P Nanoparticles Encapsulated in N,P-Codoped Hollow Carbon Nanospheres for Efficient Hydrogen Evolution, *ACS Sustainable Chem. Eng.*, 2019, **7**, 17714-17722.

[5] M. Cheng, H. Geng, Y. Yang, Y. Zhang, C. C. Li, Optimization of hydrogen adsorption free energy of Ru-based catalysts towards high efficiency hydrogen evolution reaction at all pH, *Chem-Eur. J.*, 2019, **25**, 8579-8584.

[6] Z. Liu, X. Yang, G. Hu, L. Feng, Ru Nanoclusters Coupled on Co/N-Doped Carbon Nanotubes Efficiently Catalyzed the Hydrogen Evolution Reaction, *ACS Sustainable Chem. Eng.*, 2020, **8**, 9136–9144.

[7] F. Luo, L. Guo, Y. Xie, J. Xu, W. Cai, K. Qu, Z. Yang, Robust hydrogen evolution reaction activity catalyzed by ultrasmall Rh–Rh<sub>2</sub>P nanoparticles, *J. Mater. Chem. A*, 2020, **8**, 12378-12384.

[8] J. Mahmood, F. Li, S. M. Jung, M. S. Okyay, I. Ahmad, S. J. Kim, N. Park, H. Y. Jeong, J. B. Baek, An Efficient and pH-Universal Ruthenium-Based Catalyst for the Hydrogen Evolution Reaction. *Nature Nanotechnology*, 2017, **12**, 441-446.

[9] Y. Cheng, S. Lu, F. Liao, L. Liu, Y. Li, M. Shao, Rh-MoS<sub>2</sub> Nanocomposite Catalysts with Pt-like Activity for Hydrogen Evolution Reaction, *Adv. Funct. Mater.*, 2017, **27**, 1700359.

[10] Y. Peng, B. Lu, L. Chen, N. Wang, J. E. Lu, Y. Ping, S. Chen, Hydrogen evolution reaction catalyzed by ruthenium ion-complexed graphitic carbon nitride nanosheets, *J. Mater. Chem. A*, 2017, **5**, 18261-18269.

[11] W. Zhao, C. Luo, Y. Lin, G.-B. Wang, H. M. Chen, P. Kuang, J. Yu, Pt–Ru Dimer Electrocatalyst with Electron Redistribution for Hydrogen Evolution Reaction, *ACS Catal.*, 2022, **12**, 5540-5548.

[12] H. Song, M. Wu, Z. Tang, J. S. Tse, B. Yang, S. Lu, Single Atom Ruthenium-Doped CoP/CDs Nanosheets via Splicing of Carbon-Dots for Robust Hydrogen Production, *Angew. Chem. Int. Ed.*, 2021, **60**, 7234-7244.

[13] V. Ramalingam, P. Varadhan, H. C. Fu, H. Kim, D. L. Zhang, S. M. Chen, L. Song, D. Ma, Y. Wang, H. N. Alshareef, Heteroatom-mediated interactions between ruthenium single atoms and an MXene support for efficient hydrogen evolution. *Adv. Mater.*, 2019, **31**, 1903841.

[14] Z. Ma, C. Chen, X. Cui, L. Zeng, L. Wang, W. Jiang, J. Shi, Hydrogen Evolution/Oxidation Electrocatalysts by the Self-Activation of Amorphous Platinum, *ACS Appl. Mater. Interfaces*, 2021, **13**, 44224–44233.

[15] Y. Yu, S. Yang, M. Dou, Z. Zhang, F. Wang, Photochemically activated atomic ruthenium supported on boron-doped carbon as a robust electrocatalyst for hydrogen evolution, *J. Mater. Chem. A*, 2020, **8**, 16669-16675.

[16] Y. Zhou, Y. Liu, H. Tang, B.-L. Lin, The RuO<sub>2</sub>/NiRu heterogeneous interface optimizes the d-band center of the Ni–Ru catalyst for high-performance alkaline hydrogen evolution reaction, *J. Mater. Chem. A*, 2023, DOI: 10.1039/D2TA09660A.

[17] H. Miao, D. Zhang, Y. Shi, X. Wu, W. Zhang, X. Chen, J. Lai, L. Wang, Ultrasmall Noble Metal Doped Ru<sub>2</sub>P@Ru/CNT as High-Performance Hydrogen Evolution Catalysts, *ACS Sustainable Chem. Eng.*, 2021, **9**, 15063-15071.

[18] Z. Peng, J. Liu, B. Hu, Y. Yang, Y. Guo, B. Li, L. Li, Z. Zhang, B. Cui, L. He, M. Du, Surface Engineering on Nickel–Ruthenium Nanoalloys Attached Defective Carbon Sites as Superior Bifunctional Electrocatalysts for Overall Water Splitting, *ACS Appl. Mater. Interfaces*, 2020, **12**, 13842–13851.

[19] Y. Xue, Q. Yan, X. Bai, Y. Xu, X. Zhang, Y. Li, K. Zhu, K. Ye, J. Yan, D. Cao, G. Wang, Ruthenium-nickel-cobalt alloy nanoparticles embedded in hollow carbon microtubes as a bifunctional mosaic catalyst for overall water splitting, *J Colloid Interf Sci.*, 2022, **612**, 710-721.

[20] C. Mu, H. Xin, Q. Luo, Y. Li, Fei Ma, Fabrication of Ru nanoclusters on Co-doped NiSe nanorods with efficient electrocatalytic activity towards alkaline hydrogen evolution via hydrogen spillover effect, *J. Mater. Chem. A*, 2023, **11**, 7016-7024.

[21] J. Zhang, X. Mao, S. Wang, L. Liang, M. Cao, L. Wang, G. Li, Y. Xu, X. Huang, Superlattice in a Ru Superstructure for Enhancing Hydrogen Evolution, *Angew. Chem. Int. Ed.*, 2022, **61**, e202116867.

[22] H. Song, M. Wu, Z. Tang, J. S. Tse, B. Yang, S. Lu, Single Atom Ruthenium-Doped CoP/CDs Nanosheets via Splicing of Carbon-Dots for Robust Hydrogen Production, *Angew. Chem. Int. Ed.*, 2021, **60**, 7234-7244.

[23] J. Wang, W. Fang, Y. Hu, Y. Zhang, J. Dang, Y. Wu, B. Chen, H. Zhao, Z. Li, Single atom Ru doping 2H-MoS<sub>2</sub> as highly efficient hydrogen evolution reaction electrocatalyst in a wide pH range, *Applied Catalysis B: Environmental.*, 2021, **298** 120490.

[24] Z. Liu, L. Zeng, J. Yu, L. Yang, J. Zhang, X. Zhang, F. Han, L. Zhao, X. Li, H. Liu, W. Zhou, Charge redistribution of Ru nanoclusters on Co<sub>3</sub>O<sub>4</sub> porous nanowire via the oxygen regulation for enhanced hydrogen evolution reaction, *Nano Energy.*, 2021, **85**, 105940.

- [25] H. J. Kim, E. Hong, Y. Hong, J. Kim, M. K. Kabiraz, Y.-M. Kim, H. Lee, W. S. Seo, S.-I. Choi, Surface distortion of FeRu nanoparticles improves the hydrogen evolution reaction performance in alkaline media, *Nanoscale*, 2023, **15**, 5816-5824.
- [26] D. Liu, H. Xu, C. Wang, H. Shang, R. Yu, Y. Wang, J. Li, X. Li, Y. Du, 3D Porous Ru-Doped NiCo-MOF Hollow Nanospheres for Boosting Oxygen Evolution Reaction Electrocatalysis, *Inorg. Chem.*, 2021, **60**, 5882-5889.
- [27] B. Sarkar, D. Das, K. K. Nanda, Construction of noble-metal alloys of cobalt confined N-doped carbon polyhedra toward efficient water splitting, *Green Chem.*, 2020, **22**, 7884-7895.
- [28] C. Xu, X. Yang, X. Wen, Y. Wang, Y. Sun, B. Xu, C. Li, Nitrogen-doped carbon encapsulating a RuCo heterostructure for enhanced electrocatalytic overall water splitting, *CrystEngComm*, 2022, **24**, 4208-4214.
- [29] J. Mahmood, F. Li, S. M. Jung, M. S. Okyay, I. Ahmad, S. J. Kim, N. Park, H. Y. Jeong, J. B. Baek, An efficient and pH-universal ruthenium-based catalyst for the hydrogen evolution reaction. *Nat. Nanotechnol.*, 2017, **12**, 441–446.
- [30] Z. Pu, I. S. Amiin, Z. Kou, W. Li, S. Mu, RuP<sub>2</sub>-Based Catalysts with Platinum-like Activity and Higher Durability for the Hydrogen Evolution Reaction at All pH Values, *Angew. Chem. Int. Ed.*, 2017, **56**, 11559-11564.
